# Supplementary material for: Genetic Regulation ofZfp30, CXCL1, and Neutrophilic Inflammation in Murine Lung
Source: Oxford University Press journal article supplement (doi:10.1534/genetics.114.168138), 2014-08-11
Supplement: genetics.114.168138-4.xls [file genetics.114.168138-4.xls]

## Sheet: Sheet1
Table S4. SNPs in Zfp30
position	dbsnp	A/J	NOD/ShILtJ	NZO/HILtJ	129S1/SvImJ	C57BL/6J	WSB/EiJ	CAST/EiJ	PWK/PhJ	SDP*	SNP_pattern**
30566133	rs251403112	A	A	A	A	A	A	G	A	CAST|-	concordant
30566202	rs216055474	T	T	T	T	T	T	A	T	CAST|-	concordant
30566221	rs31898338	A	A	A	C	C	C	A	C	NA	concordant
30566471	rs4226520	T	T	T	T	C	C	T	T	B6,WSB|-	concordant
30566692	rs4226519	G	G	G	G	G	G	C	G	CAST|-	concordant
30566694	rs4226518	G	G	G	G	A	A	G	G	B6,WSB|-	concordant
30566713	rs4226517	A	A	A	A	A	A	T	A	CAST|-	concordant
30566734	rs227504802	C	C	C	C	C	C	C	A	PWK|-	concordant
30566750	rs32479222	A	A	A	A	G	G	A	A	B6,WSB|-	concordant
30566966	rs215976427	A	A	A	A	A	A	C	A	CAST|-	concordant
30567061	rs31726620	C	C	C	G	G	G	C	C	B6,S1,WSB|-	concordant
30567254	rs212598176	T	T	T	T	T	T	A	T	CAST|-	concordant
30567269	rs235636986	T	T	T	T	T	T	G	T	CAST|-	concordant
30567428	-	T	T	T	T	T	T	C	T	CAST|-	concordant
30567474	rs252539943	G	G	G	G	G	G	A	G	CAST|-	concordant
30567503	rs224653912	T	T	T	C	T	T	T	T	S1|-	concordant
30567610	rs31666266	A	A	A	G	G	G	G	G	NOD,NZO,AJ|-	concordant
30567611	rs219953639	G	G	G	G	G	G	C	G	CAST|-	concordant
30567872	rs229235763	T	T	T	T	T	T	A	T	CAST|-	concordant
30567978	rs265746373	C	C	C	C	C	C	T	C	CAST|-	concordant
30567991	rs229986110	A	A	A	A	A	A	C	A	CAST|-	concordant
30568030	rs256514774	A	A	A	A	A	A	G	A	CAST|-	concordant
30568040	rs212169106	C	C	C	C	C	C	A	C	CAST|-	concordant
30568108	rs37640626	G	G	G	G	G	G	A	G	CAST|-	concordant
30568168	rs52053229	T	T	T	C	T	T	T	T	S1|-	concordant
30568186	rs253946977	G	G	G	G	G	G	A	G	CAST|-	concordant
30568219	rs235854725	G	G	G	A	G	G	G	G	S1|-	concordant
30568253	-	T	T	T	T	T	T	C	T	CAST|-	concordant
30568334	-	C	C	C	C	C	C	A	C	CAST|-	concordant
30568382	rs262334162	C	C	C	C	C	C	A	C	CAST|-	concordant
30568406	rs31985867	C	C	C	T	T	T	C	C	B6,S1,WSB|-	concordant
30568424	rs236433269	T	T	T	T	T	T	C	T	CAST|-	concordant
30568427	rs252568088	G	G	G	G	G	G	A	G	CAST|-	concordant
30568436	rs222552584	G	G	G	G	G	G	A	G	CAST|-	concordant
30568485	rs45983417	G	G	G	G	A	A	G	G	B6,WSB|-	concordant
30568513	rs230321209	G	G	G	G	G	G	G	A	PWK|-	concordant
30568827	rs32436680	C	C	C	T	T	T	C	C	B6,S1,WSB|-	concordant
30568834	rs258741331	T	T	T	T	T	T	C	T	CAST|-	concordant
30568894	rs31291744	C	C	C	T	T	T	C	C	B6,S1,WSB|-	concordant
30568902	rs211739374	C	C	C	C	C	C	A	A	CAST,PWK|-	concordant
30568951	rs230547036	G	G	G	G	G	G	C	C	CAST,PWK|-	concordant
30568974	rs252419650	C	C	C	C	C	C	T	T	CAST,PWK|-	concordant
30568990	-	T	T	T	T	T	T	C	C	CAST,PWK|-	concordant
30568999	-	C	C	C	C	C	C	T	T	CAST,PWK|-	concordant
30569018	rs239071968	G	G	G	G	G	G	A	A	CAST,PWK|-	concordant
30569041	rs51434084	G	G	G	G	C	C	C	C	B6,PWK,CAST,WSB|-	discordant
30569267	rs37438514	T	T	T	T	T	T	C	C	CAST,PWK|-	concordant
30569660	rs39483092	T	T	T	T	T	T	T	G	PWK|-	concordant
30569702	rs231292665	T	T	T	T	T	T	C	C	CAST,PWK|-	concordant
30569823	-	G	G	G	G	G	G	G	A	PWK|-	concordant
30569844	-	C	C	C	C	C	C	T	T	CAST,PWK|-	concordant
30569885	rs211748958	A	A	A	A	A	A	T	T	CAST,PWK|-	concordant
30569935	rs38842287	C	C	C	C	C	C	C	T	PWK|-	concordant
30570039	rs217150006	T	T	T	T	T	T	T	A	PWK|-	concordant
30570040	rs36443987	T	T	T	T	T	T	A	A	CAST,PWK|-	concordant
30570086	rs38636532	C	C	C	C	C	C	C	A	PWK|-	concordant
30570110	rs36701684	C	C	C	C	C	C	T	T	CAST,PWK|-	concordant
30570121	rs37218230	A	A	A	A	A	A	G	G	CAST,PWK|-	concordant
30570183	rs36638634	T	T	T	T	T	T	G	G	CAST,PWK|-	concordant
30570265	rs36402990	G	G	G	G	G	G	A	A	CAST,PWK|-	concordant
30570368	rs39065809	T	T	T	T	T	T	C	C	CAST,PWK|-	concordant
30570378	rs261421448	C	C	C	C	C	C	T	T	CAST,PWK|-	concordant
30570426	rs38900257	A	A	A	A	A	A	G	G	CAST,PWK|-	concordant
30570479	rs262533214	A	A	A	A	A	A	G	G	CAST,PWK|-	concordant
30570505	rs231492040	A	A	A	A	A	A	G	G	CAST,PWK|-	concordant
30570509	-	G	G	G	G	G	G	T	T	CAST,PWK|-	concordant
30570541	rs249480385	G	G	G	G	G	G	A	A	CAST,PWK|-	concordant
30570564	rs254935114	C	C	C	C	C	C	T	T	CAST,PWK|-	concordant
30570598	rs36501733	A	A	A	A	A	A	G	G	CAST,PWK|-	concordant
30570631	rs217082907	G	G	G	G	G	G	A	G	CAST|-	concordant
30570665	rs36320742	G	G	G	G	G	G	G	T	PWK|-	concordant
30570691	rs37182295	G	G	G	G	G	G	G	A	PWK|-	concordant
30570737	rs238892006	G	G	G	G	G	G	G	A	PWK|-	concordant
30570777	rs38431054	C	C	C	C	C	C	T	C	CAST|-	concordant
30570784	rs235492581	G	G	G	G	G	G	G	T	PWK|-	concordant
30570789	rs255377361	A	A	A	A	A	A	A	G	PWK|-	concordant
30570834	rs246673336	C	C	C	C	C	C	T	C	CAST|-	concordant
30570842	rs265107997	T	T	T	T	T	T	C	T	CAST|-	concordant
30570844	rs223773057	C	C	C	C	C	C	T	C	CAST|-	concordant
30570848	rs31785115	G	G	G	G	C	C	G	G	B6,WSB|-	concordant
30570964	rs254850008	C	C	C	C	C	C	C	T	PWK|-	concordant
30571119	rs247783459	A	A	A	A	A	A	G	A	CAST|-	concordant
30571143	rs259582753	C	C	C	T	C	C	C	C	S1|-	concordant
30571331	rs38302409	C	C	C	C	C	C	G	C	CAST|-	concordant
30571345	rs230802066	G	G	G	G	G	G	G	T	PWK|-	concordant
30571375	-	A	A	A	A	A	A	A	G	PWK|-	concordant
30571418	rs212725848	G	G	G	G	G	G	G	T	PWK|-	concordant
30571454	rs235545998	G	G	G	G	G	G	G	A	PWK|-	concordant
30571500	rs215824582	A	A	A	A	A	A	T	T	CAST,PWK|-	concordant
30571548	rs31754450	G	G	G	T	T	T	T	T	NOD,NZO,AJ|-	concordant
30571695	rs257274234	T	T	T	T	T	T	T	C	PWK|-	concordant
30571714	rs223376549	T	T	T	T	T	T	T	C	PWK|-	concordant
30571757	rs241400855	T	T	T	T	T	T	T	C	PWK|-	concordant
30571866	rs222184413	C	C	C	C	C	C	T	C	CAST|-	concordant
30571867	rs37168195	C	C	C	C	C	C	G	G	CAST,PWK|-	concordant
30572136	-	A	A	A	A	A	A	T	T	CAST,PWK|-	concordant
30572137	-	G	G	G	G	G	G	A	A	CAST,PWK|-	concordant
30572156	-	G	G	G	G	G	G	A	A	CAST,PWK|-	concordant
30572158	-	A	A	A	A	A	A	T	T	CAST,PWK|-	concordant
30572196	rs262192900	C	C	C	C	C	C	T	T	CAST,PWK|-	concordant
30572197	rs230948907	A	A	A	A	A	A	G	G	CAST,PWK|-	concordant
30572229	rs243302177	T	T	T	T	T	T	T	C	PWK|-	concordant
30572244	rs212789207	G	G	G	G	G	G	C	C	CAST,PWK|-	concordant
30572245	rs228448012	T	T	T	T	T	T	C	C	CAST,PWK|-	concordant
30572260	rs248797040	G	G	G	G	G	G	T	T	CAST,PWK|-	concordant
30572305	rs243668148	T	T	T	T	T	T	T	C	PWK|-	concordant
30572306	rs261926369	G	G	G	G	G	G	G	A	PWK|-	concordant
30572307	rs31846296	G	G	G	A	G	G	G	G	S1|-	concordant
30572322	rs222683854	T	T	T	T	T	T	T	C	PWK|-	concordant
30572335	rs242624855	A	A	A	A	A	A	G	G	CAST,PWK|-	concordant
30572381	rs258943990	G	G	G	G	G	G	A	A	CAST,PWK|-	concordant
30572511	rs264995424	T	T	T	T	T	T	C	T	CAST|-	concordant
30572542	rs37342703	A	A	A	A	A	A	A	G	PWK|-	concordant
30572570	rs245119695	G	G	G	G	G	G	T	T	CAST,PWK|-	concordant
30572732	rs263109182	A	A	A	A	A	A	T	A	CAST|-	concordant
30572778	rs265334546	C	C	C	C	C	C	C	T	PWK|-	concordant
30572801	rs227726751	T	T	T	T	T	T	C	C	CAST,PWK|-	concordant
30572861	rs254346011	C	C	C	C	C	C	C	T	PWK|-	concordant
30572929	rs235331149	T	T	T	T	T	T	G	T	CAST|-	concordant
30573000	rs218548050	A	A	A	A	A	A	G	G	CAST,PWK|-	concordant
30573018	rs238627766	C	C	C	C	C	C	C	T	PWK|-	concordant
30573025	rs235488781	T	T	T	T	T	T	C	C	CAST,PWK|-	concordant
30573043	rs245617647	G	G	G	G	G	G	A	A	CAST,PWK|-	concordant
30573050	rs216149709	A	A	A	A	A	A	G	G	CAST,PWK|-	concordant
30573221	rs262748498	T	T	T	T	T	T	C	T	CAST|-	concordant
30573306	rs223584087	A	A	A	A	A	A	T	A	CAST|-	concordant
30573507	rs217488822	C	C	C	C	C	C	T	C	CAST|-	concordant
30573578	-	A	A	A	A	A	A	T	A	CAST|-	concordant
30573584	-	A	A	A	A	A	A	T	A	CAST|-	concordant
30573626	rs262669385	A	A	A	A	A	A	G	A	CAST|-	concordant
30573712	rs218515535	C	C	C	C	C	C	G	C	CAST|-	concordant
30573724	rs231115703	A	A	A	A	A	A	G	A	CAST|-	concordant
30573742	rs250148329	T	T	T	T	T	T	C	T	CAST|-	concordant
30573804	rs31718106	G	G	G	T	G	G	G	G	S1|-	concordant
30573813	rs225060390	C	C	C	C	C	C	G	C	CAST|-	concordant
30573894	rs256862850	G	G	G	G	G	G	G	T	PWK|-	concordant
30574113	rs259137929	C	C	C	C	C	C	T	C	CAST|-	concordant
30574155	rs31302488	C	C	C	T	C	C	C	C	S1|-	concordant
30574429	rs31754785	A	A	A	G	G	G	G	G	NOD,NZO,AJ|-	concordant
30574453	rs32171578	A	A	A	G	G	G	G	G	NOD,NZO,AJ|-	concordant
