# Supplementary material for: Genetic Regulation ofZfp30, CXCL1, and Neutrophilic Inflammation in Murine Lung
Source: Oxford University Press journal article supplement (doi:10.1534/genetics.114.168138), 2014-08-11
Supplement: genetics.114.168138-5.pdf [file genetics.114.168138-5.pdf]

A

Concordant and Discordant SNPs in *Zfp30* (ENSMUST000000032803)

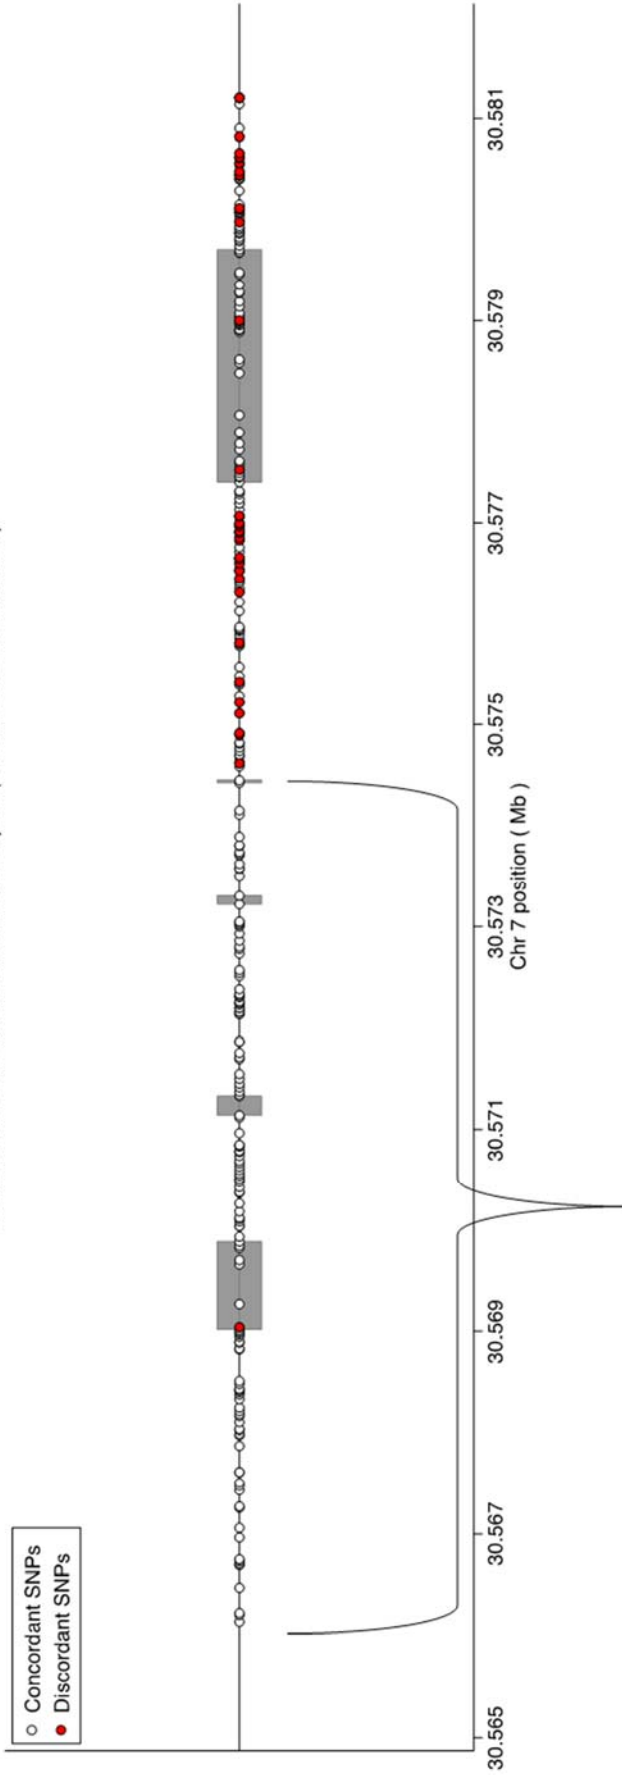

B

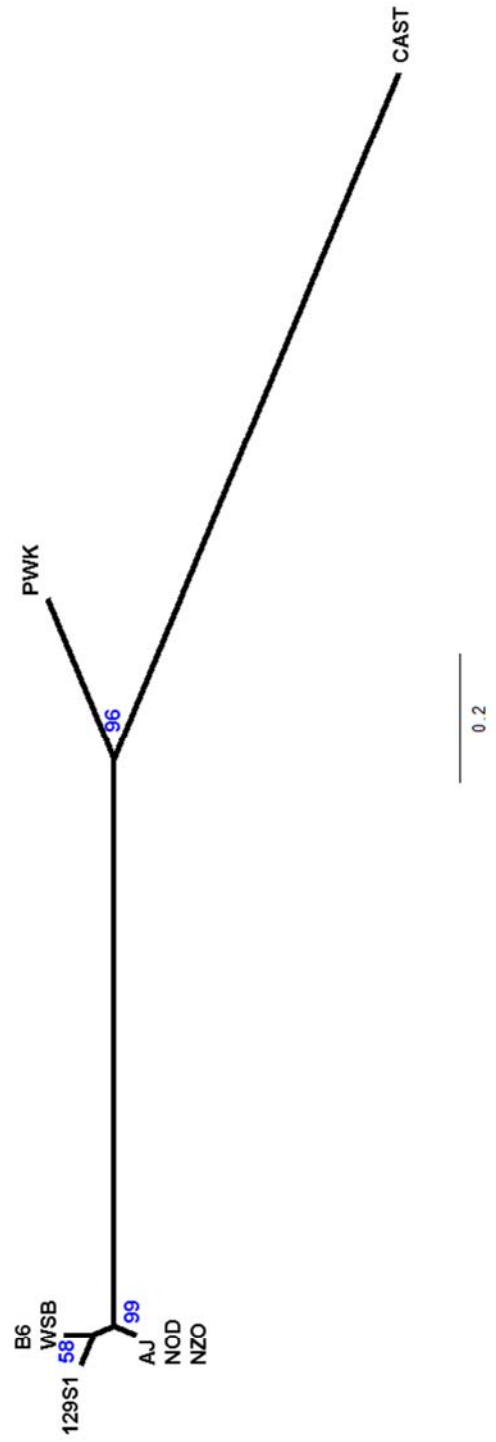

**Figure S3 SNPs and haplotypes among CC founder strains at the *Zfp30* locus. A.** SNPs (n = 242 SNPs) in *Zfp30* including 3kb of upstream and 1.5 kb of downstream sequence (30,566,017-30,581,221 bp) that are concordant (white circles) or discordant (red circles) with the pattern of gene expression shown in Figure 4. Gray boxes denote exons. **B.** Phylogeny of CC founder haplotypes for *Zfp30* sequence up to exon 4. Blue numbers indicate bootstrap support values.
