# Supplementary material for: Genetic Regulation ofZfp30, CXCL1, and Neutrophilic Inflammation in Murine Lung
Source: Oxford University Press journal article supplement (doi:10.1534/genetics.114.168138), 2014-08-11
Supplement: genetics.114.168138-6.pdf [file genetics.114.168138-6.pdf]

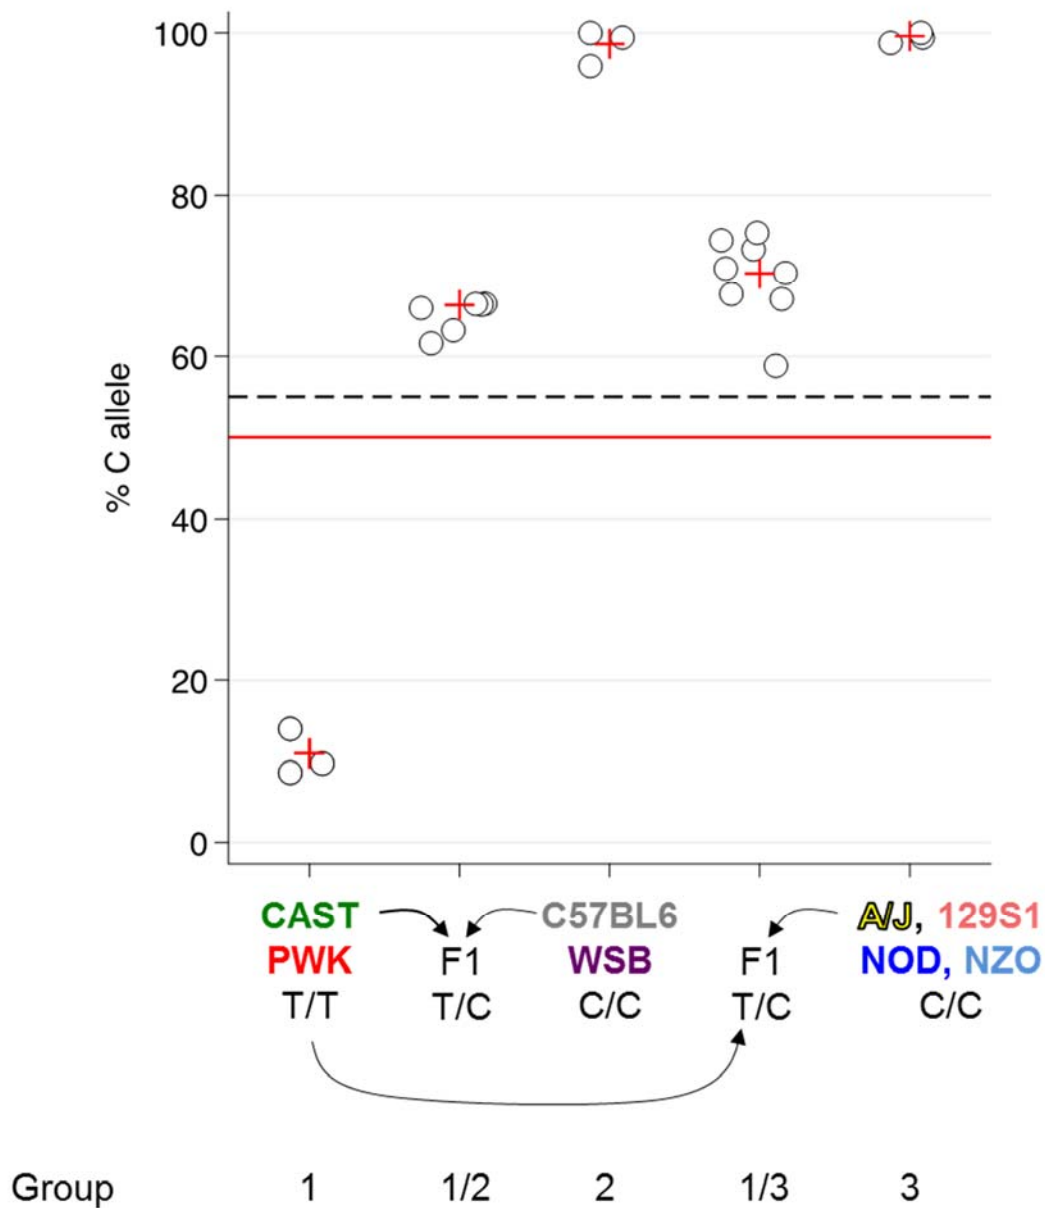

**Figure S2 Allele-specific gene expression of *Zfp30*.** Expression of alternate alleles of rs45830063 (C/T) was measured using pyro-sequencing on whole lung cDNA samples from CC founder lines (n=3/group) and F1 heterozygotes from crosses of CC founder lines from each *Zfp30* expression group (n=6-8/group). Strain groups on X-axis correspond to gene expression groups identified in Figure 4. Plus symbols denote mean. Dashed black line indicates mean of T/T and C/C homozygotes (55%). Both groups of F1 heterozygotes (1/2 and 1/3) express significantly higher levels of the C allele (>55%, one sided t-test  $p$ -value <  $1 \times 10^{-4}$ ) and Group 1/3 heterozygotes express higher levels of the C allele than Group 1/2 heterozygotes (70% vs. 66%, one sided t-test  $p$ -value = 0.04).
