# Supplementary material for: Genetic Regulation ofZfp30, CXCL1, and Neutrophilic Inflammation in Murine Lung
Source: Oxford University Press journal article supplement (doi:10.1534/genetics.114.168138), 2014-08-11
Supplement: genetics.114.168138-7.xls [file genetics.114.168138-7.xls]

## Sheet: TableS1.txt
Table S3. Genes with local eQTL in the PMN/CXCL1 QTL confidence interval on Chr 7*.
					PMN correlation		CXCL1 correlation		eQTL		LOD Scores from Conditional Analyses**
Array Probe	Entrez ID	Name	Entrez ID	Tx_start	r	p-value	r	p-value	peak (bp)*	LOD	PMN	PMN|GEX	GEX|PMN	CXCL1	CXCL1|GEX	GEX|CXCL1
ILMN_1237061	Dmpk	dystrophia myotonica-protein kinase	13400	19669344	0.0140924	0.872584	-0.0399414	0.649319	27938429	7.292	5.94	6.08609	7.11878	6.54	6.56817	6.97264
ILMN_2844153	Ppp1r37	protein phosphatase 1, regulatory subunit 37	232947	20116316	0.0230997	0.792622	-0.0020569	0.981326	29527383	8.767	5.94	5.99782	8.38528	6.54	6.59511	8.561
ILMN_1228469	Apoc1	apolipoprotein C-I	11812	20274834	0.113361	0.195595	-0.0339617	0.699059	28727674	8.353	5.94	5.66029	7.78579	6.54	6.7991	8.26916
ILMN_2920753	Arhgef1	Rho guanine nucleotide exchange factor (GEF) 1	16801	25688075	0.0299244	0.733396	0.0495279	0.572777	28559769	17.114	5.94	5.96056	16.3294	6.54	6.60495	16.1479
ILMN_2483633	Grik5	glutamate receptor, ionotropic, kainate 5 (gamma 2)	14809	25794895	-0.0838136	0.339341	-0.0232122	0.791636	27938429	8.539	5.94	5.75458	7.86678	6.54	6.63473	8.065
ILMN_2607972	Zfp526	zinc finger protein 526	210172	26006470	-0.227984	0.0085601	-0.145737	0.095439	26420348	9.436	5.94	5.29152	8.72433	6.54	6.12845	8.84351
ILMN_2650998	Erf	Ets2 repressor factor	13875	26027579	-0.145521	0.0959357	-0.139483	0.110689	26420348	7.603	5.94	5.6636	6.0569	6.54	6.6688	6.01273
ILMN_2666225	Atp5sl	ATP5S-like	66349	26404512	-0.0101532	0.908013	-0.15842	0.0696366	26420348	10.443	5.94	5.93888	9.97371	6.54	6.96206	9.86042
ILMN_2688427	Hnrnpul1	heterogeneous nuclear ribonucleoprotein U-like 1	232989	26521616	0.180819	0.0380027	0.0329591	0.707533	27101981	14.127	5.94	5.03545	12.7589	6.54	6.63849	13.8128
ILMN_1239335	Hnrnpul1	heterogeneous nuclear ribonucleoprotein U-like 1	232989	26521616	0.0360906	0.68119	0.0308138	0.725784	30277188	7.663	5.94	5.90829	6.65179	6.54	6.52902	6.84117
ILMN_2680490	Hnrnpul1	heterogeneous nuclear ribonucleoprotein U-like 1	232989	26521616	0.251449	0.0036336	0.111413	0.203433	27101981	26.915	5.94	4.09332	23.8064	6.54	6.88742	25.6849
ILMN_2688429	Hnrnpul1	heterogeneous nuclear ribonucleoprotein U-like 1	232989	26521616	0.199432	0.0218716	0.137854	0.114959	27938429	12.249	5.94	4.79668	10.3321	6.54	5.86259	10.8972
ILMN_2675170	Hnrnpul1	heterogeneous nuclear ribonucleoprotein U-like 1	232989	26521616	0.0791083	0.36724	0.0659109	0.452729	28844334	11.406	5.94	5.76216	10.7032	6.54	6.45486	10.6876
ILMN_2594926	Cyp2b10	cytochrome P450, family 2, subfamily b, polypeptide 10	13088	26682683	-0.28135	0.0010831	-0.250389	0.0037836	26463876	16.799	5.94	5.11617	16.1806	6.54	5.89204	15.8982
ILMN_2781805	Egln2	EGL nine homolog 2 (C. elegans)	112406	27943677	-0.268369	0.0018628	-0.291309	0.0007018	27938429	20.686	5.94	4.39901	19.2208	6.54	5.54831	19.6536
ILMN_2880657	Mia	melanoma inhibitory activity	12587	27964763	-0.202704	0.019754	-0.100165	0.253147	28559769	11.19	5.94	4.75632	10.4321	6.54	7.34281	12.6832
ILMN_2777087	Mia	melanoma inhibitory activity	12587	27964763	-0.164358	0.0596737	-0.0626887	0.475171	28136761	9.244	5.94	5.21932	8.68718	6.54	7.58374	10.3642
ILMN_1247582	Snrpa	small nuclear ribonucleoprotein polypeptide A	53607	27972025	0.0101538	0.908008	-0.0352413	0.688298	27918719	7.728	5.94	6.28099	7.74363	6.54	6.33358	7.20206
ILMN_2667509	Snrpa	small nuclear ribonucleoprotein polypeptide A	53607	27972025	0.0605925	0.490088	0.035262	0.688124	28185872	13.298	5.94	8.64101	15.3051	6.54	7.62524	14.2548
ILMN_1235687	Shkbp1	Sh3kbp1 binding protein 1	192192	28127152	0.208915	0.016216	0.165061	0.0585753	28167005	15.251	5.94	5.00108	13.6707	6.54	5.57245	13.3735
ILMN_2792868	Blvrb	biliverdin reductase B (flavin reductase (NADPH))	233016	28232997	0.35561	2.86e-05	0.144564	0.0981641	28167005	18.449	5.94	3.5551	16.3485	6.54	5.97329	17.9982
ILMN_2770917	Blvrb	biliverdin reductase B (flavin reductase (NADPH))	233016	28232997	-0.12063	0.16827	-0.102193	0.243615	28136761	23.703	5.94	5.57548	22.3367	6.54	6.43111	22.1919
ILMN_3154269	Prx	periaxin	19153	28284343	-0.198791	0.0223091	0.0384959	0.661213	28261530	15.68	5.94	5.35118	15.0527	6.54	6.65512	15.6077
ILMN_2593225	Prx	periaxin	19153	28284343	-0.111543	0.202904	-0.0883681	0.313652	26463876	7.973	5.94	5.811	7.8191	6.54	6.49054	7.74488
ILMN_2784950	Pld3	phospholipase D family, member 3	18807	28317037	0.0103509	0.90623	-0.145333	0.096371	27918719	11.639	5.94	7.28983	12.1112	6.54	5.96798	10.1967
ILMN_1227904	2310022A10Rik	RIKEN cDNA 2310022A10 gene	66367	28338330	-0.155696	0.0746368	-0.0235803	0.788409	28559769	9.685	5.94	5.24645	9.11502	6.54	6.84631	10.194
ILMN_2584566	2310022A10Rik	RIKEN cDNA 2310022A10 gene	66367	28338330	-0.0029522	0.973199	0.0212756	0.808671	30257634	8.959	5.94	6.24666	8.75251	6.54	6.74637	8.75829
ILMN_2613415	Map3k10	mitogen-activated protein kinase kinase kinase 10	269881	28441396	0.001517	0.986227	-0.0383442	0.662466	30201178	7.761	5.94	5.95585	7.3698	6.54	6.76069	7.62263
ILMN_1228169	Map3k10	mitogen-activated protein kinase kinase kinase 10	269881	28441396	-0.267169	0.001956	-0.203326	0.0193718	28559769	14.543	5.94	3.9392	12.6991	6.54	5.67114	14.2007
ILMN_1217583	Zfp607	zinc finger proten 607	545938	28645604	0.116991	0.181573	0.176593	0.0428108	28791458	32.673	5.94	5.75906	31.0697	6.54	6.57762	30.9561
ILMN_1239060	1700049G17Rik	RIKEN cDNA 1700049G17 gene	73430	28692411	-0.222131	0.0104706	-0.185052	0.0336498	28728418	25.073	5.94	4.4951	21.5933	6.54	5.51442	21.8539
ILMN_2986059	1700049G17Rik	RIKEN cDNA 1700049G17 gene	73430	28692411	-0.295773	0.0005748	-0.213528	0.013958	28136761	23.888	5.94	3.51984	20.9521	6.54	5.29971	21.843
ILMN_2728516	Psmc4	proteasome (prosome, macropain) 26S subunit, ATPase, 4	23996	28826721	-0.115781	0.186159	-0.104959	0.231023	28931364	25.872	5.94	5.7192	24.2169	6.54	6.4948	24.1564
ILMN_2972372	Paf1	Paf1, RNA polymerase II associated factor, homolog (S. cerevisiae)	54624	29178015	0.133267	0.127669	0.149911	0.0862212	29527383	10.027	5.94	5.45104	9.40231	6.54	5.97011	9.29326
ILMN_1222471	Gmfg	glia maturation factor, gamma	63986	29225956	0.278097	0.0012438	0.201873	0.0202744	29900264	18.199	5.94	4.06817	16.3219	6.54	5.73998	16.6386
ILMN_1227907	Gmfg	glia maturation factor, gamma	63986	29225956	0.298262	0.0005136	0.255409	0.0031196	29900264	16.299	5.94	3.84073	13.5901	6.54	5.13983	13.5453
ILMN_2737738	Fbxo27	F-box protein 27	233040	29477868	0.221595	0.0106632	0.100499	0.251561	28728418	13.12	5.94	5.64989	12.0499	6.54	6.41898	11.9733
ILMN_2777706	Mrps12	mitochondrial ribosomal protein S12	24030	29524660	-0.244855	0.0046604	-0.200169	0.0213782	29842615	46.383	5.94	4.25768	42.996	6.54	5.67877	43.4372
ILMN_1254734	Mrps12	mitochondrial ribosomal protein S12	24030	29524660	-0.218131	0.0119837	-0.231856	0.007472	29900264	33.832	5.94	4.97763	31.5406	6.54	5.29005	30.9818
ILMN_2612007	Nfkbib	nuclear factor of kappa light polypeptide gene enhancer in B cells inhibitor, beta	18036	29543270	0.0386216	0.660175	0.0350856	0.689604	29842615	17.011	5.94	6.62639	17.2511	6.54	6.75317	16.2172
ILMN_2662316	Rinl	Ras and Rab interactor-like	320435	29573996	-0.0002489	0.99774	-0.0723741	0.409548	29900264	31.353	5.94	6.1913	30.2969	6.54	6.2636	29.9196
ILMN_2627690	Hnrnpl	heterogeneous nuclear ribonucleoprotein L	15388	29595932	0.317496	0.0002077	0.200289	0.0212987	29842615	11.117	5.94	3.91139	9.57943	6.54	5.64148	10.4328
ILMN_1254786	Ech1	enoyl coenzyme A hydratase 1, peroxisomal	51798	29610357	-0.115115	0.188722	-0.227371	0.0087447	29900264	11.758	5.94	5.83353	10.3176	6.54	5.85403	9.73099
ILMN_2626235	Lgals4	lectin, galactose binding, soluble 4	16855	29619009	-0.225369	0.009372	-0.338066	7.35e-05	29527383	18.289	5.94	4.69418	16.6864	6.54	4.98637	16.0951
ILMN_2968211	Lgals4	lectin, galactose binding, soluble 4	16855	29619009	-0.164927	0.0587834	-0.258376	0.0027784	30161637	31.553	5.94	5.16006	30.4045	6.54	5.12235	29.5152
ILMN_1226498	Eif3k	eukaryotic translation initiation factor 3, subunit K	73830	29756392	-0.0498918	0.569956	-0.0169731	0.84683	29900264	9.7	5.94	5.87298	10.0708	6.54	6.55075	9.99942
ILMN_1252804	Map4k1	mitogen-activated protein kinase kinase kinase kinase 1	26411	29767873	0.227872	0.0085934	0.109626	0.210823	29900264	9.16	5.94	5.57032	8.13193	6.54	6.3836	8.21324
ILMN_2730425	Ryr1	ryanodine receptor 1, skeletal muscle	20190	29788359	-0.164602	0.0592914	-0.260484	0.0025569	29900264	8.718	5.94	5.15849	7.88996	6.54	4.40381	6.84034
ILMN_2733073	Ryr1	ryanodine receptor 1, skeletal muscle	20190	29788359	-0.139298	0.111167	-0.255669	0.0030882	29900264	7.216	5.94	5.38024	6.39744	6.54	4.83127	5.26725
ILMN_2427293	Rasgrp4	RAS guanyl releasing protein 4	233046	29920006	-0.234428	0.0068189	-0.225076	0.0094671	29842615	37.664	5.94	4.34242	34.4799	6.54	5.43914	34.3791
ILMN_2427292	Rasgrp4	RAS guanyl releasing protein 4	233046	29920006	-0.247848	0.0041659	-0.204479	0.0186807	29527383	37.183	5.94	4.18307	33.6972	6.54	5.64462	33.9135
ILMN_2506537	Fam98c	family with sequence similarity 98, member C	73833	29937531	-0.207868	0.0167709	-0.174105	0.0458725	29900264	22.381	5.94	5.9461	21.5615	6.54	6.70916	21.576
ILMN_1228808	Fam98c	family with sequence similarity 98, member C	73833	29937531	-0.207859	0.0167755	-0.174809	0.0449878	26463876	11.045	5.94	4.68919	9.17921	6.54	5.87667	9.41421
ILMN_1237951	Ggn	gametogenetin	243897	29955409	-0.0100465	0.908976	-0.0677291	0.440332	29820159	11.937	5.94	6.1161	10.9239	6.54	6.51059	10.467
ILMN_2678019	Psmd8	proteasome (prosome, macropain) 26S subunit, non-ATPase, 8	57296	29959274	-0.201925	0.0202415	-0.207608	0.0169112	29900264	50.439	5.94	5.07724	47.8971	6.54	5.34435	47.1362
ILMN_1258376	Kcnk6	potassium inwardly-rectifying channel, subfamily K, member 6	52150	30006947	0.110134	0.208703	0.095861	0.274217	30460581	11.72	5.94	6.49866	11.2376	6.54	6.97431	11.0125
ILMN_2659824	Ppp1r14a	protein phosphatase 1, regulatory (inhibitor) subunit 14A	68458	30074339	-0.20767	0.0168774	-0.254881	0.0031842	30201178	22.702	5.94	5.7063	21.3184	6.54	5.44315	20.3768
ILMN_2450096	Zfp30	zinc finger protein 30	22693	30569809	-0.357604	2.56e-05	-0.388664	4.12e-06	29900264	41.127	5.94	2.40793	35.7046	6.54	2.39707	34.4839
ILMN_1247404	Zfp420	zinc finger protein 420	233058	30644998	-0.0750494	0.392408	-0.0738644	0.399947	30201178	31.484	5.94	6.11446	30.6469	6.54	6.58384	30.2867
ILMN_3117788	Zfp27	zinc finger protein 27	22689	30678356	-0.106406	0.224622	-0.164683	0.0591635	29900264	11.571	5.94	5.69305	11.1332	6.54	5.92628	10.7038
ILMN_1238124	Zfp74	zinc finger protein 74	72723	30717810	0.035768	0.683887	0.0657577	0.453783	30337559	28.919	5.94	5.90474	27.9251	6.54	6.73142	27.8079
ILMN_3097221	Zfp82	zinc finger protein 82	330502	30841056	-0.082079	0.349466	-0.205078	0.0183299	29842615	11.121	5.94	5.75155	10.5116	6.54	5.58653	10.0145
ILMN_2441326	Zfp260	zinc finger protein 260	26466	30880095	-0.0430604	0.623958	-0.126084	0.149707	30125877	16.256	5.94	6.06216	14.9195	6.54	6.35604	15.1249
ILMN_2872499	Gm5113	predicted gene 5113	330503	30954941	-0.199826	0.0216067	-0.127599	0.144835	28727674	14.138	5.94	5.16112	12.8162	6.54	6.40247	13.5091
ILMN_2620061	Tbcb	tubulin folding cofactor B	66411	31009157	0.0134187	0.878627	-0.0967985	0.269529	30337559	16.551	5.94	6.22278	15.8325	6.54	6.39202	15.1297
ILMN_1241754	Wdr62	WD repeat domain 62	233064	31025157	0.231709	0.0075111	0.0391728	0.655632	30190817	9.147	5.94	4.6934	7.59154	6.54	6.56966	8.95182
ILMN_2720092	Alkbh6	alkB, alkylation repair homolog 6 (E. coli)	233065	31093772	-0.074278	0.397306	-0.249878	0.0038578	29842615	15.3	5.94	6.06226	14.7214	6.54	5.22734	13.4116
ILMN_2729342	Fxyd1	FXYD domain-containing ion transport regulator 1	56188	31836700	-0.0593704	0.498899	-0.0391986	0.65542	28931364	8.986	5.94	6.00356	9.51911	6.54	6.73036	9.77003
ILMN_2743831	Pepd	peptidase D	18624	35691920	0.0600874	0.49372	-0.159486	0.0677543	28826163	8.242	5.94	6.53815	8.74275	6.54	6.04207	7.37221
* Local is defined as within 10 Mb upstream or downstream of transcript. Positions listed are in Build 37 coordinates.
** LOD scores for PMN and CXCL1 differ slightly from the main text because here they are based on only mice with complete phenotype and gene expression data (n=132 vs n=151 for CXCL1 and PMN phenotypes).
LOD scores for PMN and CXCL1 correspond to Model 1 in the Methods section of the main text. The eQTL LOD is based on Model 3 in the Methods section of the main text.
Conditional analyses are represented by Phenotype|GEX and GEX|Phenotype, corresponding to models 2 and 4 in the Methods section of the main text.
