# Supplementary material for: Genetic Regulation ofZfp30, CXCL1, and Neutrophilic Inflammation in Murine Lung
Source: Oxford University Press journal article supplement (doi:10.1534/genetics.114.168138), 2014-08-11
Supplement: genetics.114.168138-8.xls [file genetics.114.168138-8.xls]

## Sheet: Sheet1
Table S2. Chr 7 Genotypes, Zfp30 Expression Groups and Frequencies Used in Narrow Sense Heritability Regression Models and Structural Equation Models
CC Founder Strain Genotype at Chr 7 Locus*	factor1	factor2	n	freq (%)
AA	2	1	7	5.34351
BA	1	0.5	3	2.29008
BB	0	0	17	12.9771
CB	1	0.5	1	0.763359
CC	2	1	7	5.34351
DA	2	1	1	0.763359
DB	1	0.5	2	1.52672
DC	2	1	2	1.52672
DD	2	1	13	9.92366
EA	2	1	1	0.763359
ED	2	1	5	3.81679
EE	2	1	14	10.687
FA	1	1	3	2.29008
FB	0	0.5	1	0.763359
FC	1	1	1	0.763359
FD	1	1	1	0.763359
FF	0	1	9	6.87023
GA	1	1	3	2.29008
GC	1	1	2	1.52672
GE	1	1	4	3.05344
GG	0	1	8	6.10687
HA	1	0.5	3	2.29008
HB	0	0.5	2	1.52672
HE	1	0.5	3	2.29008
HF	0	0.5	2	1.52672
HG	0	0.5	1	0.763359
HH	0	0	15	11.4504
Total			131
*Founder strain notation is as follows:
A. A/J
B. C57BL/6J
C. 129S1/SvImJ
D. NOD/EiJ
E. NZO/EiJ
F. CAST/EiJ
G. PWK/EiJ
H. WSB/EiJ
