# Supplementary material for: Genetic Regulation ofZfp30, CXCL1, and Neutrophilic Inflammation in Murine Lung
Source: Oxford University Press journal article supplement (doi:10.1534/genetics.114.168138), 2014-08-11
Supplement: genetics.114.168138-9.pdf [file genetics.114.168138-9.pdf]

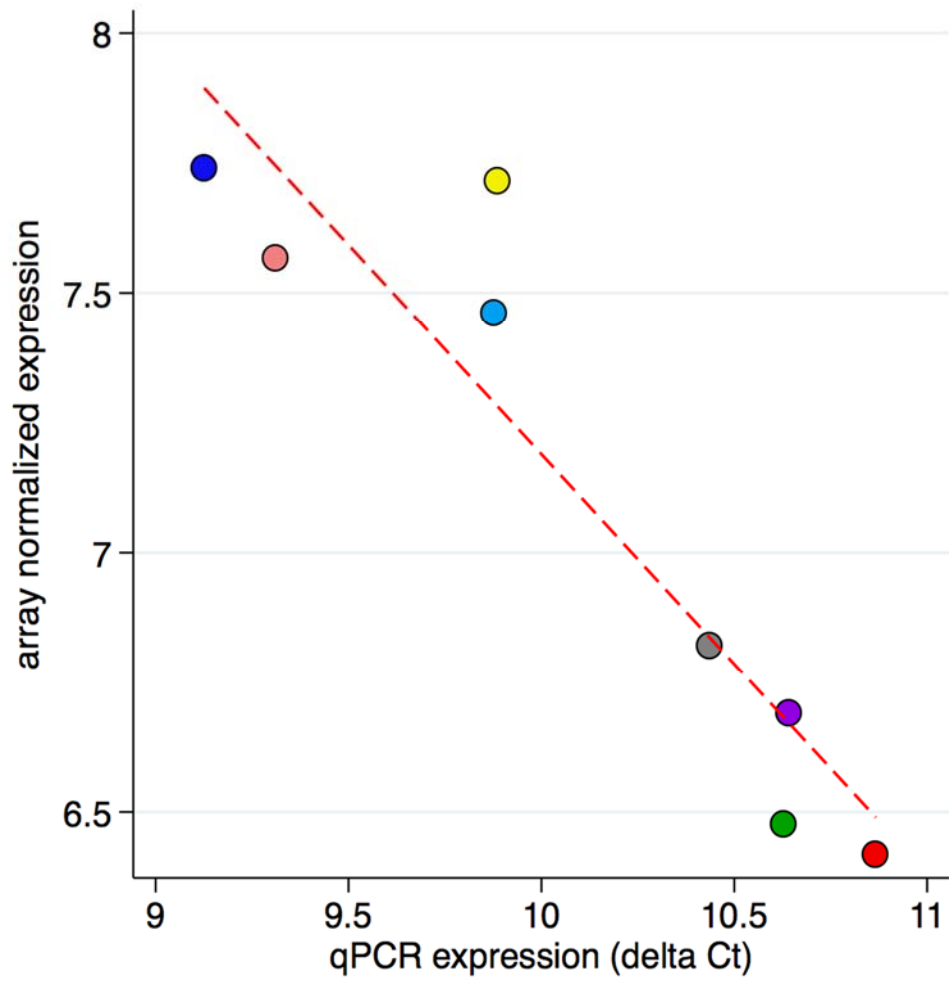

**Figure S1** *Zfp30* gene expression measured by microarray and qRT-PCR is strongly correlated. Data points represent the mean of 2-4 mice per CC founder strain and are color coded as in Figure 1. Dashed red line represents linear fit of data.  $R^2 = 0.85$  ( $p = 0.001$ ).
